# Supplementary material for: IurV, Encoded by ORF VCA0231, Is Involved in the Regulation of Iron Uptake Genes in Vibrio cholerae
Source: PubMed Central journal article supplement (PMC7600106; doi:10.3390/genes11101184), 2020-10-12
Supplement: genes-11-01184-s001.pdf [file genes-11-01184-s001.pdf]

## Figures and legends

a

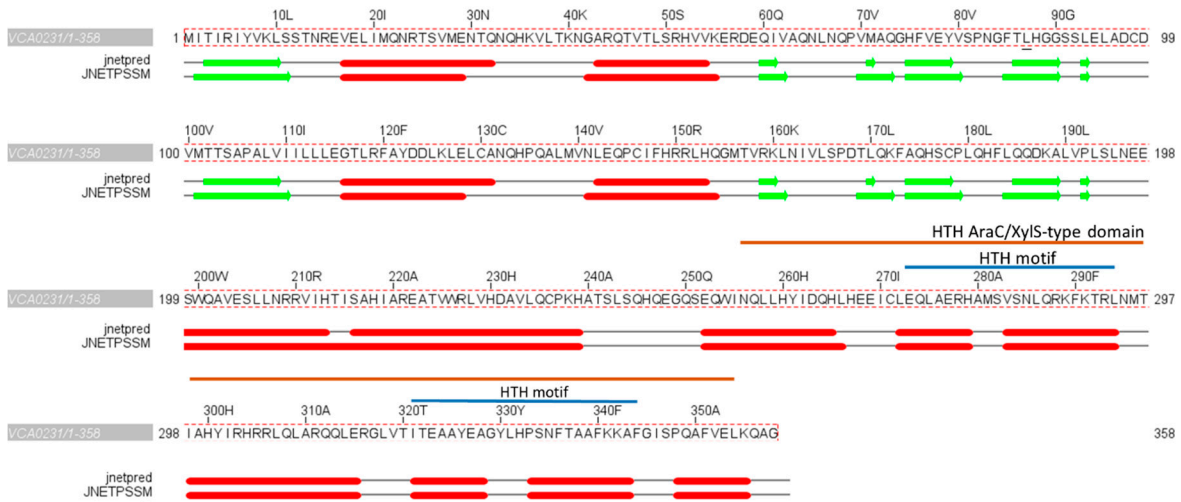

b

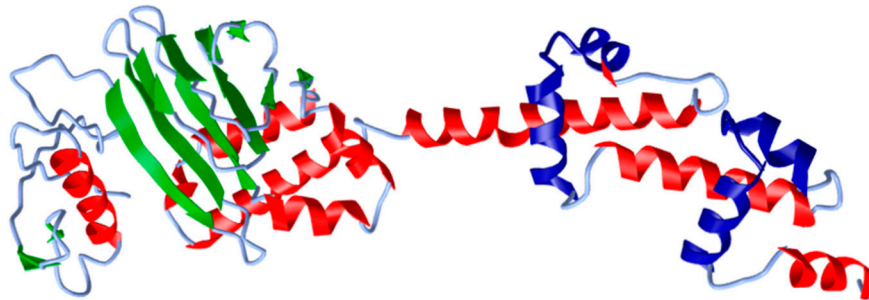

**Supplemental Figure 1. Predicted structure of the product of VCA0231.** (a) Predicted sequence and secondary structure of the protein encoded by VCA0231. The secondary structure was inferred by JPred available from Jalview. The results shown are the prediction using JNETPSSM and the jnetpred consensus using JNETPSSM, JNetALIGN and JNetHMM. Helices are indicated by red tubes and sheets by light green arrows. An AraC/XylS-type helix-turn-helix (HTH) domain with two HTH motifs detected using ScanProsite from ExPASy (<https://prosite.expasy.org/scanprosite/>) is indicated. (b) Model of the tertiary structure. The predicted primary sequence of this protein was submitted to the web server of trRosetta (<https://yanglab.nankai.edu.cn/trRosetta/>) and a tertiary structure model was obtained and visualized using iCn3D from the NCBI (<https://www.ncbi.nlm.nih.gov/Structure/icn3d/full.html>). The helices are colored in red and sheets in green. The two HTH motifs are colored in blue.

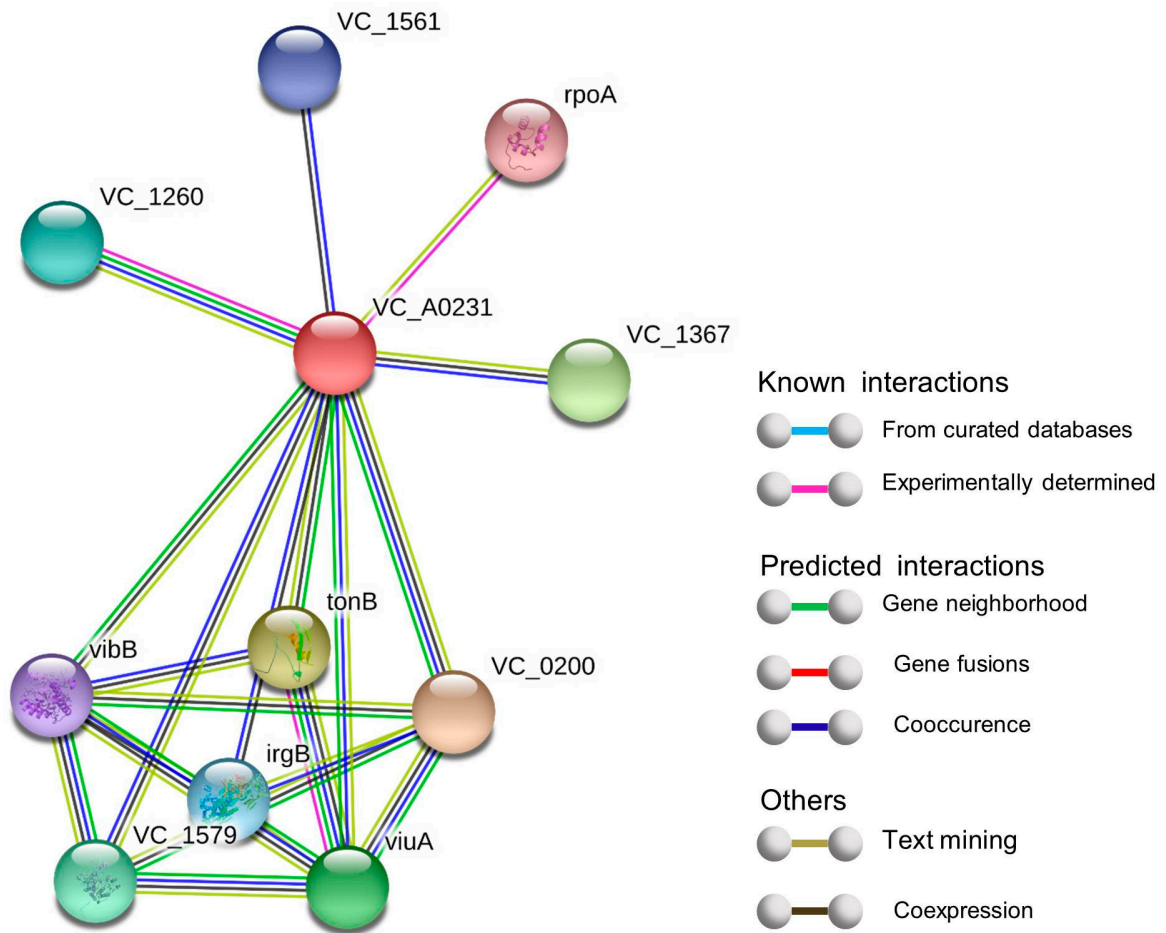

**Supplemental Figure 2.** Functional association networks of *V. cholerae* VCA0231. Interaction network retrieved from STRING database for VCA0231. Nodes represent proteins and edges represent protein–protein interactions according to the types indicated in the figure.

**Supplemental Table 1.** Primers designed in this study.

| Primer        | Sequence (5'-3')                                                    |
|---------------|---------------------------------------------------------------------|
| araC H1P1     | CCATACTGACTCAATTCCTCAAAAATACAAATGATAACGATTGGTGTAGGCTGG<br>AGCTGCTTC |
| araC H2P2     | AGGGGATAAGCTTGGCCAGAATCATGGCAATTAACCCGCCTGCATATGAATAT<br>CCTCCTTAG  |
| araC Fw       | GCCATAACGCAGACTTCTTGC                                               |
| araC Rv       | GCTTATGTCTCTATACTCTTCC                                              |
| fur Fw        | GGTCTTAAAGTTACCCTCCCACG                                             |
| fur Rv        | GCCGCCTTCAAAATGGTGACG                                               |
| SODFe Fw      | GCCAAGCGATATTCATCCAAGG                                              |
| SODFe Rv      | GCTCAGTGGCCTATCTTCATGC                                              |
| vctA Fw       | CAGCAGCCAATATGTTCCA                                                 |
| vctA Rv       | AGGCATAACCGCCGAAGATA                                                |
| vctC Fw       | GCCCATGAGCTGAATAAGGC                                                |
| vctC Rv       | GGCGCTCAACACTTCAGATT                                                |
| <b>Primer</b> | <b>Sequence (5'-3')</b>                                             |

|                  |                                                                    |
|------------------|--------------------------------------------------------------------|
| <b>araC H1P1</b> | CCATACTGACTCAATTCTCAAAAATACAAATGATAACGATTGGTGTAGGCTGGAGC<br>TGCTTC |
| <b>araC H2P2</b> | AGGGGATAAGCTTGGCCAGAATCATGGCAATTAACCCGCCTGCATATGAATATCCTC<br>CTTAG |
| <b>araC Fw</b>   | GCCATAACGCAGACTTCTTGC                                              |
| <b>araC Rv</b>   | GCTTATGTCTCTATACTCTCC                                              |
| <b>fur Fw</b>    | GGTCTTAAAGTTACCCTCCCACG                                            |
| <b>fur Rv</b>    | GCCGCCTTCAAAATGGTGACG                                              |
| <b>SODFe Fw</b>  | GCCAAGCGATATTCATCCAAGG                                             |
| <b>SODFe Rv</b>  | GCTCAGTGGCCTATCTTCATGC                                             |
| <b>vctA Fw</b>   | CAGCACGCCAATATGTTCCA                                               |
| <b>vctA Rv</b>   | AGGCATAACCGCCGAAGATA                                               |
| <b>vctC Fw</b>   | GCCCATGAGCTGAATAAGGC                                               |
| <b>vctC Rv</b>   | GGCGCTCAACACTTCAGATT                                               |

**Supplemental Table 2.** Functional interactors predicted for VCA0231 from the STRING database.

| Predicted functional partner |                                                                                                              | Neighborhood | Gene Fusion | Cooccurrence | Coexpression | Experiments | Database | Textmining | Score |
|------------------------------|--------------------------------------------------------------------------------------------------------------|--------------|-------------|--------------|--------------|-------------|----------|------------|-------|
| VC_0200                      | Iron(III) compound receptor                                                                                  | *            | *           | *            |              |             | *        |            | 0.587 |
| tonB                         | Protein TonB                                                                                                 | *            |             | *            |              |             | *        |            | 0.503 |
| VC_1367                      | GGDEF family protein                                                                                         |              |             | *            | *            |             | *        |            | 0.503 |
| viuA                         | Vibriobactin receptor; Receptor for ferric vibriobactin                                                      | *            | *           |              |              |             | *        |            | 0.500 |
| VC_1579                      | Enterobactin synthetase component F-related protein                                                          |              |             | *            | *            |             | *        |            | 0.498 |
| VC_1260                      | Transcriptional regulator, AraC/XylS family                                                                  | *            | *           |              | *            |             | *        |            | 0.472 |
| irgB                         | Iron-regulated virulence regulatory protein IrgB; Transcription activation of the irgA gene                  |              |             | *            | *            |             |          |            | 0.465 |
| VC_1561                      | Transcriptional regulator, LysR family                                                                       |              |             | *            | *            |             |          |            | 0.462 |
| vibB                         | Vibriobactin-specific isochorismatase; Involved in the biosynthesis of the catechol siderophore vibriobactin | *            |             |              | *            |             | *        |            | 0.457 |
| rpoA                         | DNA-directed RNA polymerase subunit alpha                                                                    |              |             |              | *            |             | *        |            | 0.454 |
